# Supplementary material for: Cohort profile: Finnish Health and Early Life Microbiota (HELMi) longitudinal birth cohort
Source: PubMed Central journal article supplement — BMJ Open. 2019 Jun 27;9(6):e028500. doi: 10.1136/bmjopen-2018-028500 (PMC6609051; doi:10.1136/bmjopen-2018-028500), 2019-06-27
Supplement: bmjopen-2018-028500supp001.pdf [file bmjopen-2018-028500supp001.pdf]

**Supplementary Table 1.** Parent characteristics at enrolment for the Health and Early Life Microbiota (HELMi) cohort (n = 1063).

|                                                                   |                |                           |
|-------------------------------------------------------------------|----------------|---------------------------|
| <b>Place of Residence, n (%)</b>                                  |                |                           |
| Capital region of Finland                                         | 935 (88%)      |                           |
| Helsinki                                                          | 516 (49%)      |                           |
| Espoo                                                             | 273 (26%)      |                           |
| Vantaa                                                            | 142 (13%)      |                           |
| Kauniainen                                                        | 4 (<1%)        |                           |
| Outside the capital region of Finland                             | 128 (12%)      |                           |
| <b>Housing type, n (%)</b>                                        |                |                           |
| Apartment                                                         | 591 (56%)      |                           |
| Semi-detached house                                               | 291 (27%)      |                           |
| Detached house                                                    | 181 (17%)      |                           |
| <b>Size of accommodation, m<sup>2</sup>, mean (SD)</b>            | 89 (39.7)      |                           |
| <b>Number of previous children living in the household, n (%)</b> |                |                           |
| 0                                                                 | 522 (49%)      |                           |
| 1                                                                 | 419 (39%)      |                           |
| 2                                                                 | 98 (9%)        |                           |
| ≥ 3                                                               | 24 (2%)        |                           |
|                                                                   | <b>Mothers</b> | <b>Fathers/Co-parents</b> |
| <b>Age, mean (SD)</b>                                             | 32.8 (4.1)     | 34.8 (5.3)                |
| <b>Education, n (%)</b>                                           |                |                           |
| University                                                        | 612 (58%)      | 526 (49%)                 |
| University of applied sciences                                    | 322 (30%)      | 247 (23%)                 |
| Vocational school                                                 | 78 (7%)        | 175 (16%)                 |
| Upper secondary school                                            | 41 (4%)        | 74 (7%)                   |
| Secondary school                                                  | 10 (1%)        | 26 (2%)                   |
| Not available                                                     | -              | 15 (1%)                   |

**Supplementary Table 2.** Biological parents' health.

|                                             | <b>Mothers</b> | <b>Biological fathers</b> |
|---------------------------------------------|----------------|---------------------------|
| <b>Body mass index, mean (SD)</b>           | 23.4 (3.7)*    | 25.7 (3.4)                |
| <b>Medical diagnose, n (%)</b>              | 601 (57%)      | 477 (45%)**               |
| Allergy                                     | 401 (38%)      | 326 (31%)                 |
| Atopy                                       | 113 (11%)      | 51 (5%)                   |
| Asthma                                      | 95 (9%)        | 48 (5%)                   |
| Irritable bowel syndrome                    | 69 (6%)        | 24 (2%)                   |
| Inflammatory bowel disease                  | 22 (2%)        | 24 (2%)                   |
| Coeliac disease                             | 20 (2%)        | 10 (<1%)                  |
| Type 1 diabetes mellitus                    | 3 (<1%)        | 13 (1%)                   |
| <b>Most common other maternal diagnoses</b> |                |                           |
| Hypothyroidism                              | 42 (4%)        |                           |
| Migraine                                    | 44 (4%)        |                           |
| Endometriosis                               | 9 (<1%)        |                           |
| <b>Family history of diseases, n (%)</b>    |                |                           |
| Yes                                         | 364 (7%)       | 249 (23%)                 |
| No                                          | 626 (59%)      | 670 (63%)                 |
| Unknown                                     | 73 (34%)       | 144 (14%)                 |
|                                             | <b>Mothers</b> |                           |
| <b>Pregnancy complications, n (%)</b>       |                |                           |
| Yes                                         |                | 276 (26%)                 |
| No                                          |                | 787 (74%)                 |
| Gestational diabetes                        |                | 204 (19%)                 |
| Hypertension                                |                | 31 (3%)                   |
| Intrahepatic Cholestasis                    |                | 18 (2%)                   |
| Hypothyroidism                              |                | 9 (1%)                    |
| Hepatitis                                   |                | 16 (2%)                   |
| Pre-eclampsia                               |                | 9 (<1%)                   |
| Other                                       |                | 29 (3%)                   |

\*pre-pregnancy BMI

\*\*N = 24 (2%) not available
